# Supplementary material for: Screening analysis of ubiquitin ligases reveals G2E3 as a potential target for chemosensitizing cancer cells
Source: PubMed Central journal article supplement (PMC4359243; doi:10.18632/oncotarget.2710), 2014-12-15
Supplement: oncotarget-06-617-s001.pdf [file oncotarget-06-617-s001.pdf]

## SUPPLEMENTARY FIGURE AND TABLE

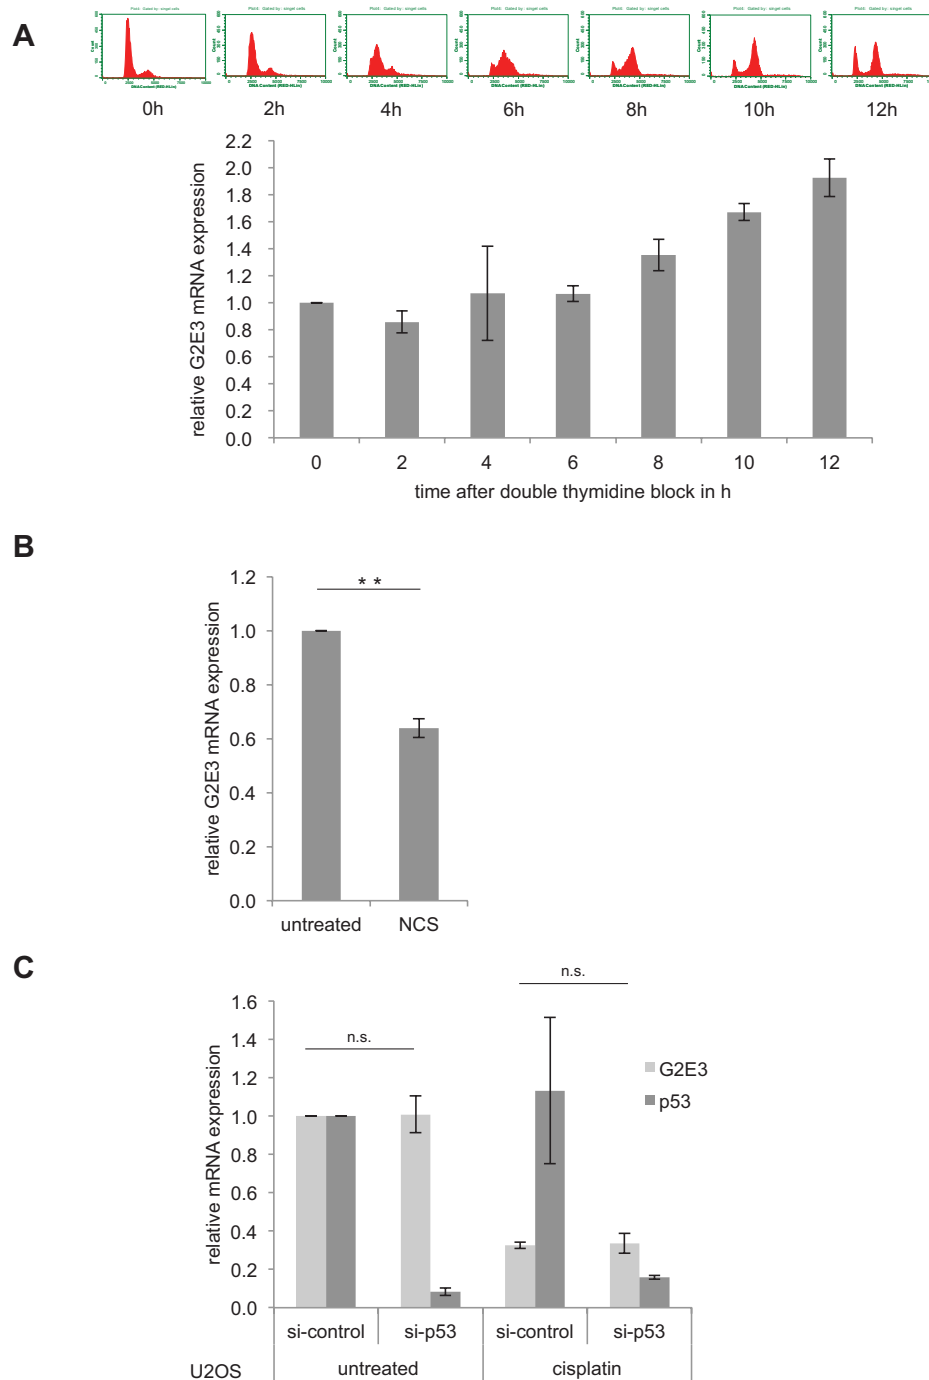

**Supplementary Figure S7: Regulation of G2E3 mRNA levels.** (A) G2E3 levels are at their maximum in the G2/M phase of the cell cycle. U2OS cells were arrested by a double thymidine block and then released. Cell cycle progression was monitored by flow cytometry of propidium iodide stained cells for 12 h after release from the block. The results in the upper panel are representative of three independent replicates. G2E3 mRNA levels were analyzed by quantitative RT-PCR at each time point. Results were normalized to the reference gene GAPDH. Data are represented as mean. Error bars represent the standard deviation (SD,  $n = 3$ ). (B) G2E3 mRNA levels are decreased after neocarzinostatin treatment. U2OS cells were transfected with control-siRNA and either left untreated or treated with 150 ng/ml neocarzinostatin (NCS) for 2 h. Cells were harvested and G2E3 mRNA levels were analyzed by quantitative RT-PCR and normalized to the reference gene GAPDH. Data are represented as mean. Error bars represent the standard deviation (SD,  $n = 3$ ).  $**p < 0.01$ , (Student's  $t$ -test). (C) Endogenous G2E3 mRNA levels are decreased after DNA damage, independent of p53. U2OS cells were transfected with control- and p53-siRNA and treated with 30  $\mu$ M cisplatin for 16 h. The cells were harvested and G2E3 and p53 mRNA levels were analyzed by quantitative RT-PCR as in B. Error bars represent the standard error of the mean (SEM,  $n = 3$ ). n.s. = not significant (Student's  $t$ -test).

**Supplementary Table S1: Results from the siRNA screen to identify modulators of the cellular response to cisplatin.** U2OS cells were transfected with a library containing siRNAs against 327 human ubiquitin ligases and 92 deubiquitinating enzymes with three different siRNAs per target gene. The cells were treated with 30  $\mu$ M cisplatin for 16 h, fixed and stained for  $\gamma$ H2AX. Automated microscopy and image analysis was performed using the BD Pathway System. A robust z-score was assigned to each siRNA as a measure of H2AX phosphorylation. Genes are sorted by the average robust z-score of the three siRNAs. PC = positive control.
